# Supplementary material for: Is searching full text more effective than searching abstracts?
Source: Springer Nature journal article supplement (doi:10.1186/1471-2105-10-46), 2009-02-03

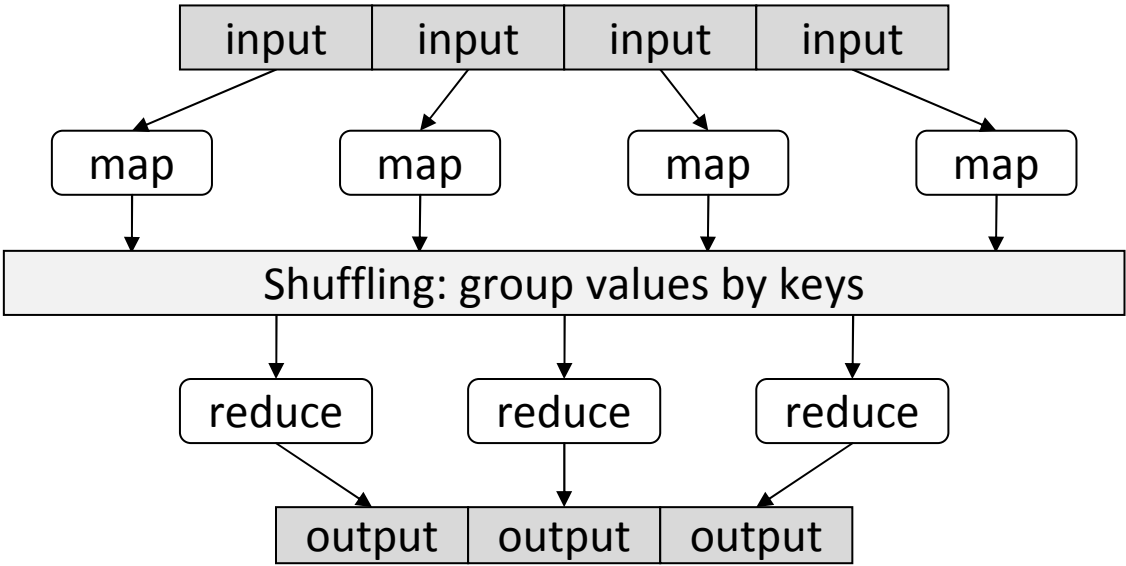

Supplement: 12859_2008_2776_MOESM1_ESM.pdf [file 12859_2008_2776_MOESM1_ESM.pdf]
