# Supplementary material for: Is searching full text more effective than searching abstracts?
Source: Springer Nature journal article supplement (doi:10.1186/1471-2105-10-46), 2009-02-03
Supplement: 12859_2008_2776_MOESM2_ESM.pdf [file 12859_2008_2776_MOESM2_ESM.pdf]

```

1: procedure MAP( $k, d$ )
2:   INITIALIZE.ASSOCIATIVEARRAY( $H$ )
3:   for all  $t \in d$  do
4:      $H\{t\} \leftarrow H\{t\} + 1$ 
5:     for all  $t \in H$  do
6:       EMIT( $t, \langle k, H\{t\} \rangle$ )
1: procedure REDUCE( $t, [\langle k_1, f_1 \rangle, \langle k_2, f_2 \rangle \dots]$ )
2:   INITIALIZE.LIST( $P$ )
3:   for all  $\langle k, f \rangle \in [\langle k_1, f_1 \rangle, \langle k_2, f_2 \rangle \dots]$  do
4:     APPEND( $P, \langle k, f \rangle$ )
5:   SORT( $P$ )
6:   EMIT( $t, P$ )

```
