# Supplementary material for: Is searching full text more effective than searching abstracts?
Source: Springer Nature journal article supplement (doi:10.1186/1471-2105-10-46), 2009-02-03
Supplement: 12859_2008_2776_MOESM3_ESM.pdf [file 12859_2008_2776_MOESM3_ESM.pdf]

```

1: procedure MAP( $t, P$ )
2:    $[Q_1, Q_2, \dots, Q_n] \leftarrow$  LOADQUERIES()
3:   for all  $Q_i \in [Q_1, Q_2, \dots, Q_n]$  do
4:     if  $t \in Q_i$  then
5:       INITIALIZE.ASSOCIATIVEARRAY( $H$ )
6:       for all  $\langle k, f \rangle \in P$  do
7:          $H\{k\} \leftarrow w_{t,q} \cdot w_{t,d}$ 
8:       EMIT( $i, H$ )
1: procedure REDUCE( $i, [H_1, H_2, H_3, \dots]$ )
2:   INITIALIZE.ASSOCIATIVEARRAY( $H_f$ )
3:   for all  $H \in [H_1, H_2, H_3, \dots]$  do
4:     MERGE( $H_f, H$ )
5:   EMIT( $i, H_f$ )

```
